# Supplementary material for: On the calculation of second-order magnetic properties using subsystem approaches in a relativistic framework
Source: Royal Society of Chemistry journal article supplement (doi:10.1039/c6cp08561j), 2017-01-01
Supplement: c6cp08561j_esi_001.zip [file c6cp08561j_esi_001.zip]

**Table 1** The absolute isotropic shielding values (in ppm) of nuclei in H<sub>2</sub>X (X = Se, Te, Po) subsystems in H<sub>2</sub>X-H<sub>2</sub>O systems ( $\sigma_{iso}^{super}$ ), absolute property shifts,  $\Delta\sigma_{iso}$ , (in ppm) and relative property shifts,  $\delta\sigma_{iso}$ , (in percent in parenthesis), calculated in isolated H<sub>2</sub>X molecules ("me") and in H<sub>2</sub>X molecules with the presence of H<sub>2</sub>O accounted for by FDE with unrelaxed and relaxed densities ("FDE(0)" and "FDE(4)", respectively) with various FDE approximations: 0,  $v$ ,  $v + w_u$ ,  $v + w_u + w_c$  (explanation in text).

| Species                            | Hamiltonian | Atom           | $\sigma_{iso}^{super}$ | $\Delta\sigma_{iso}^{FDE(4)} \left( \delta\sigma_{iso}^{FDE(4)} \right)$ |                |                |                 | $\Delta\sigma_{iso}^{FDE(0)} \left( \delta\sigma_{iso}^{FDE(0)} \right)$ |               |               |                 | $\Delta\sigma_{iso}^{me} \left( \delta\sigma_{iso}^{me} \right)$ |
|------------------------------------|-------------|----------------|------------------------|--------------------------------------------------------------------------|----------------|----------------|-----------------|--------------------------------------------------------------------------|---------------|---------------|-----------------|------------------------------------------------------------------|
|                                    |             |                |                        | 0                                                                        | $v$            | $v + w_u$      | $v + w_u + w_c$ | 0                                                                        | $v$           | $v + w_u$     | $v + w_u + w_c$ |                                                                  |
|                                    |             |                |                        |                                                                          |                |                |                 |                                                                          |               |               |                 |                                                                  |
| H <sub>2</sub> Se-H <sub>2</sub> O | DC          | Se             | 2378.03                | -100.75 (-4.24)                                                          | -12.54 (-0.53) | -12.55 (-0.53) | -12.33 (-0.52)  | -90.16 (-3.79)                                                           | -8.66 (-0.36) | -8.72 (-0.37) | -8.49 (-0.36)   | 38.25 (1.61)                                                     |
|                                    |             | H <sub>b</sub> | 30.88                  | -0.39 (-1.27)                                                            | -0.83 (-2.68)  | -0.67 (-2.16)  | -0.62 (-2.01)   | -0.55 (-1.79)                                                            | -0.95 (-3.08) | -0.79 (-2.57) | -0.75 (-2.42)   | -2.09 (-6.77)                                                    |
|                                    |             | H              | 33.42                  | 0.24 (0.71)                                                              | 0.02 (0.06)    | 0.03 (0.08)    | 0.03 (0.08)     | 0.25 (0.76)                                                              | 0.06 (0.17)   | 0.06 (0.19)   | 0.06 (0.19)     | 0.43 (1.29)                                                      |
| H <sub>2</sub> Te-H <sub>2</sub> O | DC          | Te             | 4667.85                | -142.39 (-3.05)                                                          | -4.62 (-0.10)  | -9.16 (-0.20)  | -8.88 (-0.19)   | -130.69 (-2.80)                                                          | -0.60 (-0.01) | -5.04 (-0.11) | -4.77 (-0.10)   | 67.48 (1.45)                                                     |
|                                    |             | H <sub>b</sub> | 35.62                  | -0.29 (-0.80)                                                            | -0.68 (-1.90)  | -0.44 (-1.23)  | -0.42 (-1.18)   | -0.38 (-1.07)                                                            | -0.75 (-2.11) | -0.51 (-1.44) | -0.49 (-1.39)   | -1.70 (-4.77)                                                    |
|                                    |             | H              | 37.85                  | -0.02 (-0.05)                                                            | 0.01 (0.02)    | 0.02 (0.06)    | 0.02 (0.07)     | 0.01 (0.02)                                                              | 0.04 (0.09)   | 0.05 (0.14)   | 0.05 (0.14)     | 0.54 (1.41)                                                      |
| H <sub>2</sub> Po-H <sub>2</sub> O | DC          | Po             | 13985.80               | -224.54 (-1.61)                                                          | 18.28 (0.13)   | -3.52 (-0.03)  | -3.13 (-0.02)   | -214.79 (-1.54)                                                          | 21.32 (0.15)  | 0.19 (0.00)   | 0.58 (0.00)     | 137.84 (0.99)                                                    |
|                                    |             | H <sub>b</sub> | 40.80                  | 0.50 (1.23)                                                              | 0.07 (0.16)    | -0.09 (-0.23)  | -0.09 (-0.23)   | 0.47 (1.15)                                                              | 0.05 (0.11)   | -0.11 (-0.27) | -0.11 (-0.26)   | -0.57 (-1.40)                                                    |
|                                    |             | H              | 42.29                  | -0.22 (-0.52)                                                            | -0.03 (-0.08)  | 0.00 (-0.01)   | 0.00 (-0.01)    | -0.19 (-0.45)                                                            | -0.01 (-0.02) | 0.02 (0.05)   | 0.02 (0.05)     | 0.89 (2.09)                                                      |

**Table 2** The absolute anisotropic shielding values (in ppm) of nuclei in H<sub>2</sub>X (X = Se, Te, Po) subsystems in H<sub>2</sub>X-H<sub>2</sub>O systems ( $\sigma_{aniso}^{super}$ ), absolute property shifts,  $\Delta\sigma_{aniso}$ , (in ppm) and relative property shifts,  $\delta\sigma_{aniso}$ , (in percent in parenthesis), calculated in isolated H<sub>2</sub>X molecules ("me") and in H<sub>2</sub>X molecules with the presence of H<sub>2</sub>O accounted for by FDE with unrelaxed and relaxed densities ("FDE(0)" and "FDE(4)", respectively) with various FDE approximations: 0,  $v$ ,  $v + w_u$ ,  $v + w_u + w_c$  (explanation in text).

| Species                            | Hamiltonian | Atom           | $\sigma_{aniso}^{super}$ | $\Delta\sigma_{aniso}^{FDE(4)} \left( \delta\sigma_{aniso}^{FDE(4)} \right)$ |                |                |                 | $\Delta\sigma_{aniso}^{FDE(0)} \left( \delta\sigma_{aniso}^{FDE(0)} \right)$ |                |                |                 | $\Delta\sigma_{aniso}^{me} \left( \delta\sigma_{aniso}^{me} \right)$ |
|------------------------------------|-------------|----------------|--------------------------|------------------------------------------------------------------------------|----------------|----------------|-----------------|------------------------------------------------------------------------------|----------------|----------------|-----------------|----------------------------------------------------------------------|
|                                    |             |                |                          | 0                                                                            | $v$            | $v + w_u$      | $v + w_u + w_c$ | 0                                                                            | $v$            | $v + w_u$      | $v + w_u + w_c$ |                                                                      |
|                                    |             |                |                          |                                                                              |                |                |                 |                                                                              |                |                |                 |                                                                      |
| H <sub>2</sub> Se-H <sub>2</sub> O | DC          | Se             | 609.27                   | 21.80 (3.58)                                                                 | -0.13 (-0.02)  | -0.43 (-0.07)  | -0.19 (-0.03)   | 20.61 (3.38)                                                                 | -0.07 (-0.01)  | -0.38 (-0.06)  | -0.13 (-0.02)   | 0.17 (0.03)                                                          |
|                                    |             | H <sub>b</sub> | 22.19                    | 5.05 (22.78)                                                                 | 6.00 (27.04)   | 5.76 (25.98)   | 5.70 (25.67)    | 5.26 (23.69)                                                                 | 6.12 (27.60)   | 5.89 (26.55)   | 5.82 (26.24)    | 7.29 (32.86)                                                         |
|                                    |             | H              | 15.13                    | -1.17 (-7.72)                                                                | -0.22 (-1.47)  | -0.22 (-1.44)  | -0.21 (-1.42)   | -1.07 (-7.07)                                                                | -0.20 (-1.33)  | -0.20 (-1.31)  | -0.19 (-1.29)   | 0.09 (0.59)                                                          |
| H <sub>2</sub> Te-H <sub>2</sub> O | DC          | Te             | 1189.67                  | 29.78 (2.50)                                                                 | 0.56 (0.05)    | -1.22 (-0.10)  | -1.21 (-0.10)   | 28.16 (2.37)                                                                 | 0.41 (0.03)    | -1.29 (-0.11)  | -1.28 (-0.11)   | 3.60 (0.30)                                                          |
|                                    |             | H <sub>b</sub> | 14.59                    | 0.50 (3.42)                                                                  | 0.02 (0.12)    | 0.24 (1.62)    | 0.28 (1.89)     | 0.43 (2.93)                                                                  | -0.06 (-0.39)  | 0.17 (1.16)    | 0.21 (1.43)     | -1.31 (-8.99)                                                        |
|                                    |             | H              | 15.24                    | 0.54 (3.57)                                                                  | 0.09 (0.62)    | 0.08 (0.53)    | 0.08 (0.53)     | 0.49 (3.23)                                                                  | 0.06 (0.38)    | 0.04 (0.29)    | 0.05 (0.30)     | -0.64 (-4.21)                                                        |
| H <sub>2</sub> Po-H <sub>2</sub> O | DC          | Po             | 5556.67                  | 61.88 (1.11)                                                                 | -15.12 (-0.27) | -18.36 (-0.33) | -18.61 (-0.33)  | 48.66 (0.88)                                                                 | -26.12 (-0.47) | -29.42 (-0.53) | -29.81 (-0.54)  | -463.51 (-8.34)                                                      |
|                                    |             | H <sub>b</sub> | 105.25                   | 0.98 (0.93)                                                                  | -1.28 (-1.21)  | -1.67 (-1.59)  | -1.67 (-1.59)   | 0.78 (0.75)                                                                  | -1.41 (-1.34)  | -1.79 (-1.70)  | -1.79 (-1.70)   | -6.01 (-5.71)                                                        |
|                                    |             | H              | 107.80                   | 1.93 (1.79)                                                                  | 0.16 (0.15)    | 0.08 (0.08)    | 0.09 (0.08)     | 1.78 (1.65)                                                                  | 0.06 (0.06)    | -0.02 (-0.02)  | -0.02 (-0.02)   | -4.03 (-3.74)                                                        |

**Table 3** The absolute isotropic,  $\sigma_{iso}$ , and anisotropic,  $\sigma_{aniso}$ , shielding values (in ppm) of nuclei in H<sub>2</sub>X subsystems in H<sub>2</sub>X-H<sub>2</sub>O (X = Se, Te, Po) systems, absolute property shifts,  $\Delta\sigma_{iso}$  and  $\Delta\sigma_{aniso}$ , (in ppm) and relative property shifts,  $\delta\sigma_{iso}$  and  $\delta\sigma_{aniso}$ , (in percent in parenthesis), calculated in isolated H<sub>2</sub>X molecules ("me") and in H<sub>2</sub>X molecules with the presence of H<sub>2</sub>O accounted for by FDE with unrelaxed and relaxed densities ("FDE(0)" and "FDE(4)", respectively).

| Species                            | Hamiltonian | Atom           | $\sigma_{iso}^{super}$ | $\Delta(\sigma_{iso})$ ( $\delta(\sigma_{iso})$ ) |                |               | $\sigma_{aniso}^{super}$ | $\Delta(\sigma_{aniso})$ ( $\delta(\sigma_{aniso})$ ) |                |                 |
|------------------------------------|-------------|----------------|------------------------|---------------------------------------------------|----------------|---------------|--------------------------|-------------------------------------------------------|----------------|-----------------|
|                                    |             |                |                        | FDE(4)                                            | FDE(0)         | me            |                          | FDE(4)                                                | FDE(0)         | me              |
| H <sub>2</sub> Se-H <sub>2</sub> O | ZORA-SO     | Se             | 2261.59                | -11.30 (-0.50)                                    | -8.84 (-0.39)  | 34.89 (1.54)  | 628.15                   | 4.43 (0.71)                                           | 4.50 (0.72)    | 4.89 (0.78)     |
|                                    |             | H <sub>b</sub> | 30.10                  | -0.77 (-2.57)                                     | -0.86 (-2.85)  | -2.07 (-6.89) | 23.95                    | 5.83 (24.33)                                          | 5.91 (24.67)   | 7.22 (30.14)    |
|                                    |             | H              | 32.55                  | -0.03 (-0.10)                                     | -0.01 (-0.02)  | 0.35 (1.09)   | 16.97                    | -0.24 (-1.39)                                         | -0.22 (-1.31)  | 0.11 (0.64)     |
| H <sub>2</sub> Te-H <sub>2</sub> O | ZORA-SO     | Te             | 4251.23                | -9.61 (-0.23)                                     | -6.42 (-0.15)  | 64.66 (1.52)  | 1219.57                  | 0.55 (0.05)                                           | 0.51 (0.04)    | 0.80 (0.07)     |
|                                    |             | H <sub>b</sub> | 33.43                  | -0.46 (-1.38)                                     | -0.52 (-1.54)  | -1.59 (-4.76) | 18.09                    | 3.87 (21.41)                                          | 3.92 (21.69)   | 4.90 (27.11)    |
|                                    |             | H              | 35.47                  | 0.00 (-0.01)                                      | 0.02 (0.05)    | 0.45 (1.27)   | 13.09                    | -0.33 (-2.52)                                         | -0.32 (-2.44)  | -0.09 (-0.72)   |
| H <sub>2</sub> Po-H <sub>2</sub> O | ZORA-SO     | Po             | 11168.82               | -20.93 (-0.19)                                    | -18.28 (-0.16) | 101.35 (0.91) | 3138.04                  | -45.36 (-1.45)                                        | -50.82 (-1.62) | -304.56 (-9.71) |
|                                    |             | H <sub>b</sub> | 37.46                  | -0.21 (-0.55)                                     | -0.22 (-0.59)  | -0.82 (-2.20) | 62.41                    | -1.32 (-2.11)                                         | -1.37 (-2.20)  | -4.11 (-6.58)   |
|                                    |             | H              | 38.99                  | 0.00 (0.00)                                       | 0.02 (0.04)    | 0.67 (1.71)   | 64.80                    | 0.25 (0.39)                                           | 0.21 (0.32)    | -2.05 (-3.17)   |

**Table 4** Reduced indirect spin-spin couplings: isotropic ( $K_{iso}^{super}$ ) and anisotropic ( $K_{aniso}^{super}$ ) values (in SI) in  $H_2X$  subsystems in  $H_2X-H_2O$  ( $X = Se, Te, Po$ ) systems with DC and ZORA-SO Hamiltonians, together with absolute ( $\Delta K$ ) and relative ( $\delta K$ , in percent in parenthesis) property shifts calculated in isolated  $H_2X$  molecules ("me") and in  $H_2X$  molecules with the presence of  $H_2O$  accounted for by FDE with unrelaxed and relaxed densities ("FDE(0)" and "FDE(4)", respectively).

| Species      | Hamiltonian | Nuclei |    | $K_{iso}^{super}$ | $K_{iso}$     |               |               | $K_{aniso}^{super}$ | $K_{aniso}$   |               |                 |
|--------------|-------------|--------|----|-------------------|---------------|---------------|---------------|---------------------|---------------|---------------|-----------------|
|              |             |        |    |                   | FDE(4)        | FDE(0)        | me            |                     | FDE(4)        | FDE(0)        | me              |
| $H_2Se-H_2O$ | ZORA-SO     | $H_b$  | Se | -12.63            | 1.08 (-8.56)  | 1.50 (-11.90) | 6.58 (-52.12) | 130.61              | -2.01 (-1.54) | -1.87 (-1.43) | 1.15 (0.88)     |
|              |             | H      | Se | -16.41            | 0.87 (-5.28)  | 0.92 (-5.59)  | 1.88 (-11.47) | 127.57              | -0.24 (-0.19) | -0.31 (-0.25) | -1.03 (-0.81)   |
|              |             | $H_b$  | H  | -1.11             | -0.03 (2.80)  | -0.03 (3.01)  | -0.07 (5.94)  | -0.83               | 0.01 (-0.73)  | 0.01 (-0.79)  | 0.01 (-1.75)    |
|              | DC          | $H_b$  | Se | -11.22            | 1.52 (-13.52) | 2.17 (-19.35) | 7.25 (-64.63) | 113.79              | -1.23 (-1.08) | -1.14 (-1.00) | 1.25 (1.10)     |
|              |             | H      | Se | -16.04            | 0.07 (-0.42)  | 0.16 (-0.98)  | 1.51 (-9.43)  | 110.68              | -0.33 (-0.30) | -0.42 (-0.38) | -1.01 (-0.91)   |
|              |             | $H_b$  | H  | -0.77             | 0.00 (-0.40)  | 0.00 (-0.10)  | -0.02 (3.11)  | 0.89                | 0.00 (-0.43)  | 0.00 (-0.51)  | -0.01 (-1.27)   |
|              | ZORA-SO     | $H_b$  | Te | -55.69            | 1.84 (-3.31)  | 2.26 (-4.05)  | 9.82 (-17.62) | 226.45              | -1.00 (-0.44) | -0.57 (-0.25) | 8.95 (3.95)     |
|              |             | H      | Te | -64.05            | -0.02 (0.03)  | 0.06 (-0.09)  | 1.44 (-2.24)  | 214.87              | -0.52 (-0.24) | -0.64 (-0.30) | -2.61 (-1.22)   |
|              |             | $H_b$  | H  | -0.94             | -0.02 (2.47)  | -0.03 (2.72)  | -0.06 (6.50)  | -0.34               | 0.00 (0.30)   | 0.00 (0.15)   | 0.00 (-1.04)    |
| $H_2Te-H_2O$ | DC          | $H_b$  | Te | -53.11            | 1.69 (-3.18)  | 2.24 (-4.22)  | 9.08 (-17.10) | 208.54              | -0.42 (-0.20) | -0.01 (-0.01) | 8.07 (3.87)     |
|              |             | H      | Te | -59.98            | 0.16 (-0.27)  | 0.27 (-0.45)  | 2.18 (-3.64)  | 198.09              | -0.44 (-0.22) | -0.57 (-0.29) | -2.37 (-1.20)   |
|              |             | $H_b$  | H  | -0.75             | 0.00 (-0.01)  | 0.00 (0.23)   | -0.03 (3.74)  | 0.42                | 0.00 (-0.21)  | 0.00 (-0.21)  | 0.00 (0.41)     |
|              | ZORA-SO     | $H_b$  | Po | -439.33           | 1.02 (-0.23)  | 0.98 (-0.22)  | -0.87 (0.20)  | 343.71              | 1.40 (0.41)   | 2.15 (0.63)   | 666.43 (193.89) |
|              |             | H      | Po | -435.42           | 0.40 (-0.09)  | 0.48 (-0.11)  | 4.12 (-0.95)  | -315.34             | 0.98 (-0.31)  | 1.12 (-0.35)  | 7.19 (-2.28)    |
|              |             | $H_b$  | H  | -0.80             | -0.02 (2.81)  | -0.02 (2.93)  | -0.07 (8.42)  | 0.78                | 0.00 (0.28)   | 0.00 (0.47)   | 0.08 (10.45)    |
|              | DC          | $H_b$  | Po | -442.55           | 1.37 (-0.31)  | 1.41 (-0.32)  | -1.25 (0.28)  | 429.17              | 3.10 (0.72)   | 4.18 (0.97)   | 41.96 (9.78)    |
|              |             | H      | Po | -437.24           | 0.45 (-0.10)  | 0.57 (-0.13)  | 5.04 (-1.15)  | 388.29              | -0.18 (-0.05) | -0.15 (-0.04) | 2.24 (0.58)     |
|              |             | $H_b$  | H  | -0.61             | 0.00 (-0.31)  | 0.00 (-0.15)  | -0.04 (6.02)  | 0.69                | 0.00 (-0.19)  | 0.00 (0.07)   | 1.32 (191.46)   |

**Table 5** Absolute SO-ZORA isotropic and anisotropic shielding values ( $\sigma_{\text{iso}}^{\text{super}}$  and  $\sigma_{\text{aniso}}^{\text{super}}$ , in ppm) of nuclei in  $\text{H}_2\text{X}$  (X = Se, Te, Po) subsystems in  $\text{H}_2\text{X}-\text{H}_2\text{O}$ , and absolute shifts ( $\Delta\sigma$ , in ppm) for the isolated (“ME”) and embedded (“FDE(4)”)  $\text{H}_2\text{X}$  molecules in the presence of  $\text{H}_2\text{O}$  calculated with three different basis sets in the ADF software.

| Atom         | Basis set | $\sigma_{\text{iso}}^{\text{super}}$ | $\Delta\sigma_{\text{iso}}^{\text{FDE(4)}}$ | $\Delta\sigma_{\text{iso}}^{\text{ME}}$ | $\sigma_{\text{aniso}}^{\text{super}}$ | $\Delta\sigma_{\text{aniso}}^{\text{FDE(4)}}$ | $\Delta\sigma_{\text{aniso}}^{\text{ME}}$ |
|--------------|-----------|--------------------------------------|---------------------------------------------|-----------------------------------------|----------------------------------------|-----------------------------------------------|-------------------------------------------|
| Se           | TZP       | 2265.90                              | −9.87                                       | 35.75                                   | 621.50                                 | 1.89                                          | 3.04                                      |
|              | TZ2P      | 2261.59                              | −11.30                                      | 34.89                                   | 628.15                                 | 4.43                                          | 4.89                                      |
|              | QZ4P      | 2280.66                              | −12.04                                      | 38.90                                   | 615.07                                 | −0.34                                         | −0.19                                     |
| $\text{H}_b$ | TZP       | 30.24                                | −0.78                                       | −2.09                                   | 24.08                                  | 5.83                                          | 7.22                                      |
|              | TZ2P      | 30.10                                | −0.77                                       | −2.07                                   | 23.95                                  | 5.83                                          | 7.22                                      |
|              | QZ4P      | 30.09                                | −0.74                                       | −2.06                                   | 23.77                                  | 5.76                                          | 7.13                                      |
| H            | TZP       | 32.72                                | −0.02                                       | 0.37                                    | 17.07                                  | −0.25                                         | 0.08                                      |
|              | TZ2P      | 32.55                                | −0.03                                       | 0.35                                    | 16.97                                  | −0.24                                         | 0.11                                      |
|              | QZ4P      | 32.57                                | −0.01                                       | 0.40                                    | 16.84                                  | −0.29                                         | 0.07                                      |
| Te           | TZP       | 4256.56                              | −10.53                                      | 67.59                                   | 1215.68                                | 0.77                                          | 1.76                                      |
|              | TZ2P      | 4251.23                              | −9.61                                       | 64.66                                   | 1219.57                                | 0.55                                          | 0.80                                      |
|              | QZ4P      | 4270.26                              | −11.39                                      | 68.87                                   | 1239.64                                | −1.70                                         | 1.16                                      |
| $\text{H}_b$ | TZP       | 33.33                                | −0.41                                       | −1.61                                   | 18.75                                  | 3.93                                          | 5.17                                      |
|              | TZ2P      | 33.43                                | −0.46                                       | −1.59                                   | 18.09                                  | 3.87                                          | 4.90                                      |
|              | QZ4P      | 33.47                                | −0.45                                       | −1.65                                   | 17.85                                  | 3.84                                          | 4.89                                      |
| H            | TZP       | 35.41                                | 0.01                                        | 0.47                                    | 13.55                                  | −0.32                                         | −0.03                                     |
|              | TZ2P      | 35.47                                | 0.00                                        | 0.45                                    | 13.09                                  | −0.33                                         | −0.09                                     |
|              | QZ4P      | 35.60                                | −0.01                                       | 0.48                                    | 12.87                                  | −0.35                                         | −0.09                                     |
| Po           | TZP       | 11160.06                             | −18.50                                      | 109.87                                  | 3216.05                                | −37.81                                        | −311.11                                   |
|              | TZ2P      | 11168.82                             | −20.93                                      | 101.35                                  | 3138.04                                | −45.36                                        | −304.56                                   |
|              | QZ4P      | 11800.79                             | −9.72                                       | 132.69                                  | 4513.02                                | −12.75                                        | −365.17                                   |
| $\text{H}_b$ | TZP       | 37.38                                | −0.14                                       | −0.80                                   | 60.83                                  | −0.97                                         | −4.16                                     |
|              | TZ2P      | 37.46                                | −0.21                                       | −0.82                                   | 62.41                                  | −1.32                                         | −4.11                                     |
|              | QZ4P      | 37.11                                | −0.20                                       | −0.84                                   | 65.70                                  | −1.43                                         | −4.46                                     |
| H            | TZP       | 38.88                                | 0.01                                        | 0.68                                    | 63.36                                  | 0.31                                          | −1.98                                     |
|              | TZ2P      | 38.99                                | 0.00                                        | 0.67                                    | 64.80                                  | 0.25                                          | −2.05                                     |
|              | QZ4P      | 38.74                                | 0.00                                        | 0.76                                    | 68.14                                  | 0.13                                          | −2.38                                     |

**Table 6** SO-ZORA isotropic and anisotropic reduced indirect spin-spin couplings ( $K_{\text{iso}}^{\text{super}}$  and  $K_{\text{aniso}}^{\text{super}}$ , in SI) for the  $\text{H}_2\text{X}$  subsystem in  $\text{H}_2\text{X}-\text{H}_2\text{O}$ , and absolute shifts ( $\Delta K$ , in SI) for the isolated (“ME”) and embedded (“FDE(4)”)  $\text{H}_2\text{X}$  molecules in the presence of  $\text{H}_2\text{O}$  calculated with three different basis sets in the ADF software..

| Nuclei       |    | Basis set | $K_{\text{iso}}^{\text{super}}$ | $\Delta K_{\text{iso}}^{\text{FDE(4)}}$ | $\Delta K_{\text{iso}}^{\text{ME}}$ | $K_{\text{aniso}}^{\text{super}}$ | $\Delta K_{\text{aniso}}^{\text{FDE(4)}}$ | $\Delta K_{\text{aniso}}^{\text{ME}}$ |
|--------------|----|-----------|---------------------------------|-----------------------------------------|-------------------------------------|-----------------------------------|-------------------------------------------|---------------------------------------|
| $\text{H}_b$ | Se | TZP       | −11.35                          | 1.18                                    | 6.84                                | 127.51                            | −1.95                                     | 0.96                                  |
|              |    | TZ2P      | −12.63                          | 1.08                                    | 6.58                                | 130.61                            | −2.01                                     | 1.15                                  |
|              |    | QZ4P      | −15.38                          | 2.40                                    | 8.45                                | 132.31                            | −1.72                                     | 1.62                                  |
| H            | Se | TZP       | −15.54                          | 0.71                                    | 1.72                                | 124.67                            | −0.35                                     | −1.02                                 |
|              |    | TZ2P      | −16.41                          | 0.87                                    | 1.88                                | 127.57                            | −0.24                                     | −1.03                                 |
|              |    | QZ4P      | −21.18                          | 0.08                                    | 1.64                                | 128.66                            | −0.31                                     | −1.07                                 |
| $\text{H}_b$ | H  | TZP       | −0.89                           | −0.01                                   | −0.05                               | 0.50                              | 0.00                                      | 0.00                                  |
|              |    | TZ2P      | −1.11                           | −0.03                                   | −0.07                               | 0.51                              | 0.01                                      | −0.01                                 |
|              |    | QZ4P      | −1.00                           | 0.03                                    | −0.01                               | 0.89                              | 0.00                                      | −0.01                                 |
| $\text{H}_b$ | Te | TZP       | −52.34                          | 0.29                                    | 8.84                                | 219.59                            | −0.70                                     | 8.58                                  |
|              |    | TZ2P      | −55.69                          | 1.84                                    | 9.82                                | 226.45                            | −1.00                                     | 8.95                                  |
|              |    | QZ4P      | −63.84                          | 2.20                                    | 11.03                               | 236.34                            | −0.37                                     | 9.40                                  |
| H            | Te | TZP       | −59.63                          | 0.23                                    | 1.53                                | 208.62                            | −0.46                                     | −2.37                                 |
|              |    | TZ2P      | −64.05                          | −0.02                                   | 1.44                                | 214.87                            | −0.53                                     | −2.61                                 |
|              |    | QZ4P      | −72.53                          | 0.11                                    | 2.32                                | 224.22                            | −0.50                                     | −2.71                                 |
| $\text{H}_b$ | H  | TZP       | −0.95                           | −0.01                                   | −0.05                               | 0.40                              | 0.00                                      | −0.01                                 |
|              |    | TZ2P      | −0.94                           | −0.02                                   | −0.06                               | 0.20                              | 0.00                                      | 0.00                                  |
|              |    | QZ4P      | −0.99                           | 0.01                                    | −0.03                               | 0.34                              | 0.01                                      | 0.01                                  |
| $\text{H}_b$ | Po | TZP       | −425.78                         | −1.41                                   | −2.34                               | 337.14                            | 0.24                                      | 33.59                                 |
|              |    | TZ2P      | −439.33                         | 1.02                                    | −0.87                               | 343.72                            | 1.40                                      | 34.68                                 |
|              |    | QZ4P      | −501.00                         | 0.84                                    | −2.12                               | 454.11                            | 3.39                                      | 47.78                                 |
| H            | Po | TZP       | −420.47                         | 0.78                                    | 4.07                                | 303.25                            | −0.48                                     | 0.81                                  |
|              |    | TZ2P      | −435.41                         | 0.40                                    | 4.12                                | 308.77                            | −0.49                                     | 0.87                                  |
|              |    | QZ4P      | −493.97                         | 0.43                                    | 6.12                                | 407.17                            | −0.30                                     | 2.29                                  |
| $\text{H}_b$ | H  | TZP       | −0.78                           | −0.01                                   | −0.06                               | 0.74                              | 0.00                                      | 0.08                                  |
|              |    | TZ2P      | −0.80                           | −0.02                                   | −0.07                               | 0.78                              | 0.00                                      | 0.08                                  |
|              |    | QZ4P      | −0.83                           | −0.01                                   | −0.05                               | 0.85                              | 0.01                                      | 0.09                                  |

**Table 7** Isotropic  $\xi_{iso}$  magnetizability values (in SI units) calculated for  $H_2X-H_2O$  ( $X = Se, Te, Po$ ) systems, for  $H_2X$  and  $H_2O$  subsystems (and their sums) treated as isolated species ("me") and with environmental effects accounted for by FDE with unrelaxed and relaxed densities ("FDE(0)" and "FDE(4)", respectively) with various FDE approximations: 0,  $v$ ,  $v + w_u$ ,  $v + w_u + w_c$  (explanations in text). The absolute property shifts,  $\Delta\xi_{iso}$ , (in SI units), and the relative property shifts,  $\delta\xi_{iso}$ , (in percent in parenthesis), are calculated as differences between the value for supermolecule and the sum of magnetizability values for each subsystem.

| Species                            | Hamiltonian | system                             | $\xi_{iso}^{super}$ | $\xi_{iso}^{FDE(4)}$ |               |              |              | $\xi_{iso}^{FDE(0)}$ |               |              |              | $\xi_{me}$   |
|------------------------------------|-------------|------------------------------------|---------------------|----------------------|---------------|--------------|--------------|----------------------|---------------|--------------|--------------|--------------|
|                                    |             |                                    |                     | 0                    | v             | v+w11        | v+w11+w12    | 0                    | v             | v+w11        | v+w11+w12    |              |
| H <sub>2</sub> Se-H <sub>2</sub> O | DC          | SeH <sub>2</sub>                   | –                   | -183.07              | -608.99       | -606.54      | -606.54      | -254.81              | -608.60       | -606.14      | -606.21      | -602.19      |
|                                    |             | H <sub>2</sub> O                   | –                   | 781.33               | -233.79       | -233.78      | -233.76      | 168.35               | -233.95       | -233.95      | -233.39      | -234.19      |
|                                    |             | sum                                | -836.26             | 598.26               | -842.77       | -840.32      | -840.30      | -86.46               | -842.55       | -840.08      | -839.60      | -836.31      |
|                                    |             | $\Delta\xi_{iso}(\delta\xi_{iso})$ | 0.0                 | -1434.52 (171.54)    | 6.51 (-0.78)  | 4.06 (-0.49) | 4.04 (-0.48) | -749.80 (89.66)      | 6.29 (-0.75)  | 3.82 (-0.46) | 3.34 (-0.40) | 0.05 (-0.01) |
| H <sub>2</sub> Te-H <sub>2</sub> O | DC          | TeH <sub>2</sub>                   | –                   | -630.07              | -858.94       | -848.68      | -848.74      | -656.71              | -858.64       | -848.32      | -848.38      | -842.57      |
|                                    |             | H <sub>2</sub> O                   | –                   | 235.10               | -233.74       | -233.74      | -233.60      | -105.38              | -233.85       | -233.85      | -234.28      | -233.83      |
|                                    |             | sum                                | -1080.67            | -394.97              | -1092.69      | -1082.42     | -1082.33     | -762.08              | -1092.49      | -1082.17     | -1082.66     | -1076.39     |
|                                    |             | $\Delta\xi_{iso}(\delta\xi_{iso})$ | 0.0                 | -685.71 (63.45)      | 12.01 (-1.11) | 1.74 (-0.16) | 1.66 (-0.15) | -318.59 (29.48)      | 11.82 (-1.09) | 1.49 (-0.14) | 1.99 (-0.18) | -4.28 (0.40) |
| H <sub>2</sub> Po-H <sub>2</sub> O | DC          | PoH <sub>2</sub>                   | –                   | -895.55              | -1030.19      | -949.80      | -949.71      | -903.29              | -1030.07      | -949.56      | -949.45      | -940.09      |
|                                    |             | H <sub>2</sub> O                   | –                   | -169.52              | -234.11       | -234.10      | -233.18      | -230.95              | -234.16       | -234.15      | -233.32      | -234.02      |
|                                    |             | sum                                | -1184.04            | -1065.08             | -1264.30      | -1183.91     | -1182.89     | -1134.24             | -1264.22      | -1183.71     | -1182.78     | -1174.11     |
|                                    |             | $\Delta\xi_{iso}(\delta\xi_{iso})$ | 0.0                 | -118.96 (10.05)      | 80.26 (-6.78) | -0.13 (0.01) | -1.15 (0.10) | -49.80 (4.21)        | 80.19 (-6.77) | -0.33 (0.03) | -1.26 (0.11) | -9.92 (0.84) |

**Table 8** First anisotropic  $\xi_{\text{aniso1}}$  magnetizability values (in SI units) calculated for  $\text{H}_2\text{X}-\text{H}_2\text{O}$  ( $\text{X} = \text{Se}, \text{Te}, \text{Po}$ ) systems, for  $\text{H}_2\text{X}$  and  $\text{H}_2\text{O}$  subsystems (and their sums) treated as isolated species ("me") and with environmental effects accounted for by FDE with unrelaxed and relaxed densities ("FDE(0)" and "FDE(4)", respectively) with various FDE approximations: 0,  $v$ ,  $v + w_H$ ,  $v + w_H + w_C$  (explanations in text). The absolute property shifts,  $\Delta\xi_{\text{aniso1}}$ , (in SI units), and the relative property shifts,  $\delta\xi_{\text{aniso1}}$ , (in percent in parenthesis), are calculated as differences between the value for supermolecule and the sum of magnetizability values for each subsystem.

[illegible]

**Table 9** Second anisotropic  $\xi_{\text{anis}o2}$  magnetizability values (in SI units) calculated for  $\text{H}_2\text{X}-\text{H}_2\text{O}$  ( $\text{X} = \text{Se}, \text{Te}, \text{Po}$ ) systems, for  $\text{H}_2\text{X}$  and  $\text{H}_2\text{O}$  subsystems (and their sums) treated as isolated species ("me") and with environmental effects accounted for by FDE with unrelaxed and relaxed densities ("FDE(0)" and "FDE(4)", respectively) with various FDE approximations: 0,  $v$ ,  $v + w_u$ ,  $v + w_u + w_c$  (explanations in text). The absolute property shifts,  $\Delta\xi_{\text{anis}o2}$ , (in SI units), and the relative property shifts,  $\delta\xi_{\text{anis}o2}$ , (in percent in parenthesis), are calculated as differences between the value for supermolecule and the sum of magnetizability values for each subsystem.

[illegible]
